# Supplementary material for: Comparison of influence between two types of cold surge on haze dispersion in Eastern China
Source: Copernicus journal article supplement (doi:10.5194/acp-2021-436), 2021-06-28
Supplement: Supplementary file 1 [file acp-2021-436-supplement.pdf]

1 **Comparison of influence between two types of cold surge**  
2 **on haze dispersion in Eastern China**

3 **Supplementary material**

4

5 Shiyue Zhang<sup>1</sup>, Gang Zeng<sup>1</sup>, Xiaoye Yang<sup>1</sup>, Ruixi Wu<sup>2</sup>, Zhicong Yin<sup>1,3</sup>

6 <sup>1</sup> Key Laboratory of Meteorological Disaster of Ministry of Education (KLME),  
7 Collaborative Innovation Center on Forecast and Evaluation of Meteorological Disasters (CIC-FEMD),  
8 Nanjing University of Information Science and Technology, Nanjing, 210044, China

9 <sup>2</sup> Meteorological Bureau of Jiading District, Shanghai 201815, China

10 <sup>3</sup> Southern Marine Science and Engineering Guangdong Laboratory (Zhuhai), Zhuhai, 519080, China

11 *Correspondence to:* Gang Zeng ([zenggang@nuist.edu.cn](mailto:zenggang@nuist.edu.cn))

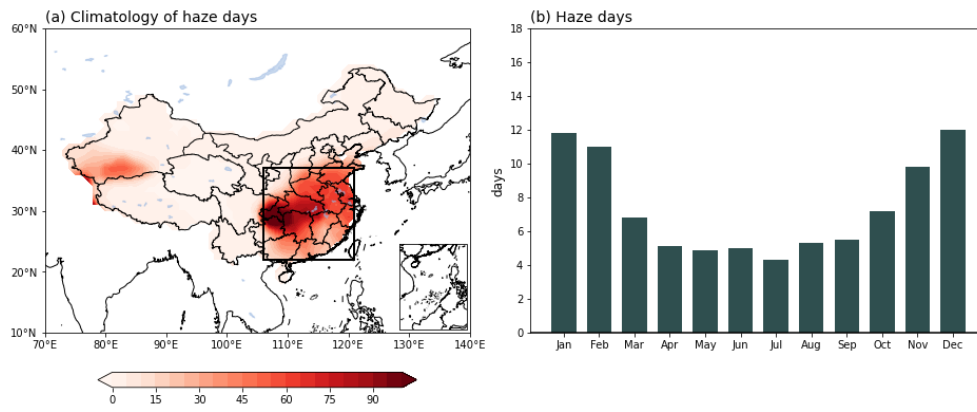

12

13 **Figure S1.** (a) Spatial distribution of the annual haze days (day) in China averaged from 1980 to 2017. (b) Monthly

14 variation of the regional-averaged haze days in the area of 22°N-37°N, 106°E-121°E.

15

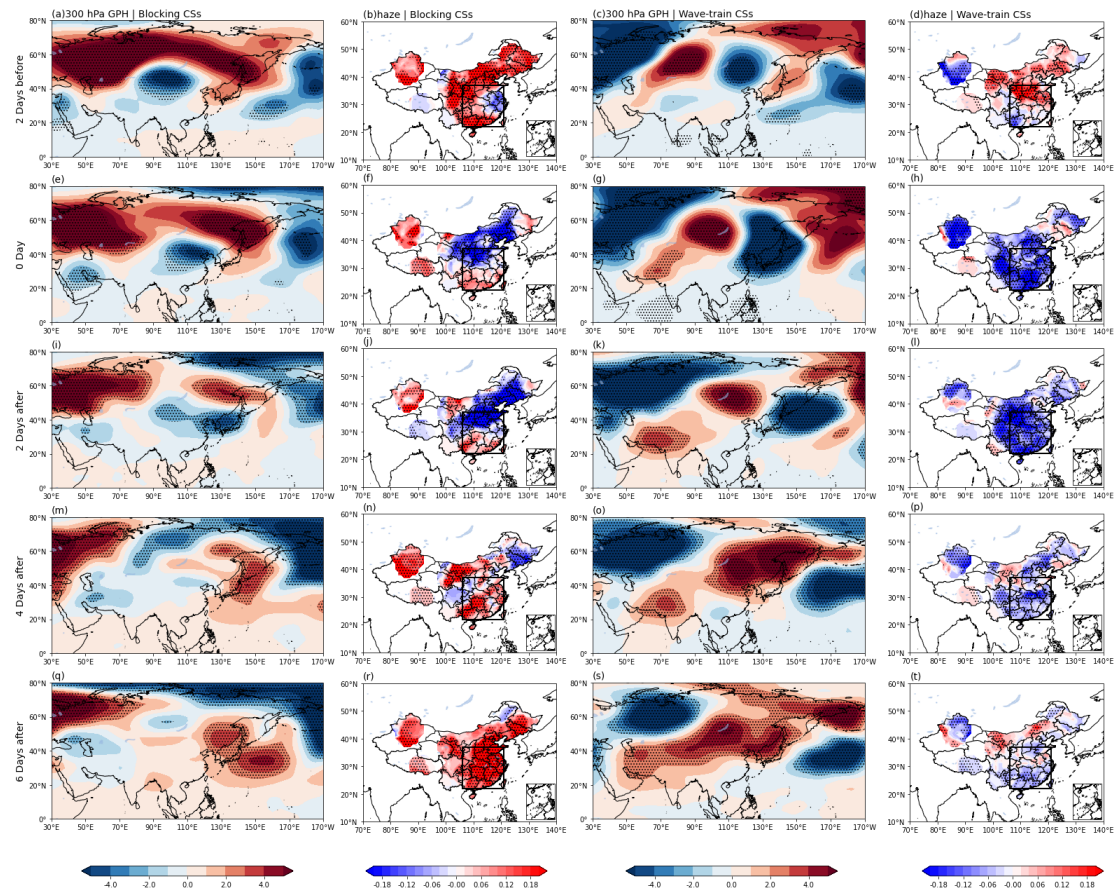

16

17 **Figure S2.** Composite of GPH anomalies (shading; gpm) at 300 hPa from -2 days to 6 days for blocking CSs outbreak  
 18 (a, e, i, m, q), and wave-train CSs outbreak (c, g, k, o, s), and the related spatial distribution of PM<sub>2.5</sub> (shading;  $\mu$   
 19  $\text{gm}^{-3}$ ) (b, f, j, n, r and d, h, l, p, t) from 2014 to 2019.

20

21

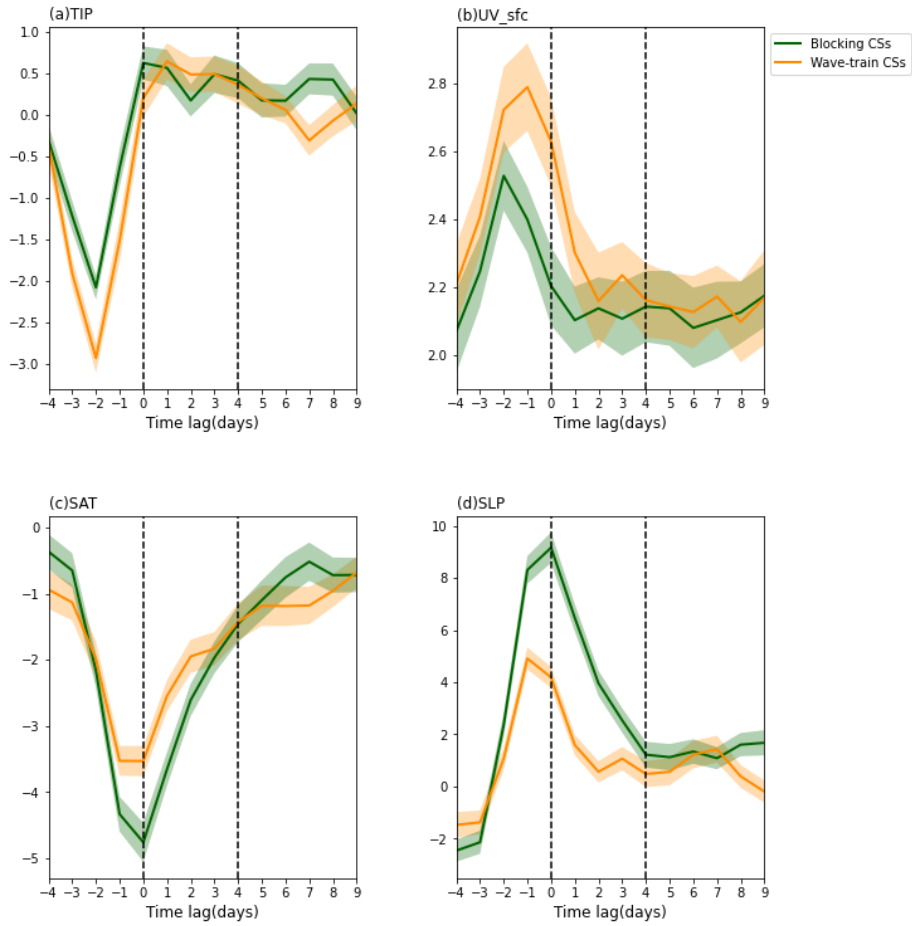

22

23 **Figure S3.** Mean (a) TIP anomalies (K), (b) UV\_sfc anomalies ( $\text{m s}^{-1}$ ), (c) SAT anomalies (K), and (d) SLP anomalies

24 (hPa) in EC during 9 days before and after the outbreak of the blocking CSs (blue lines) and wave-train CSs (red

25 lines) over  $90^{\circ}\text{E}$ – $130^{\circ}\text{E}$  and  $40^{\circ}\text{N}$ – $65^{\circ}\text{N}$ , respectively. Shading represents plus/minus one standard deviation among

26 the CSs.

27
